# Supplementary material
Source: MDPI journal article supplement (https://www.mdpi.com/2073-4395/12/7/1559)

**Supplementary Figure S3: The de-etiolated seedlings germinating in the dark followed by a one-day exposure to light.** The first row is 'Doongara', the second row is 'Reiziq', and the third row is the F1 hybrid.

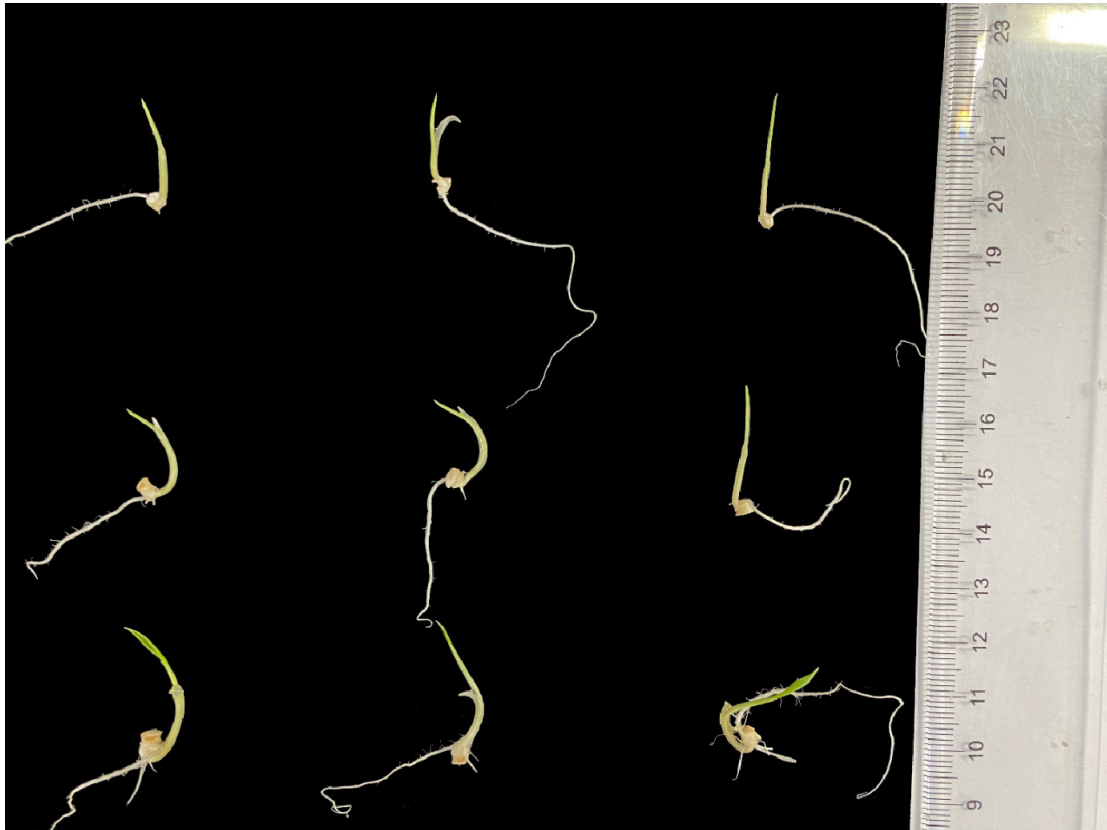

Supplement: s1 [file s1]
