# Supplementary material
Source: MDPI journal article supplement (https://www.mdpi.com/2073-4395/12/7/1559)

Supplementary Figure S1: The early growth patterns of the other Australian hybrid lines not examined in detail in this study

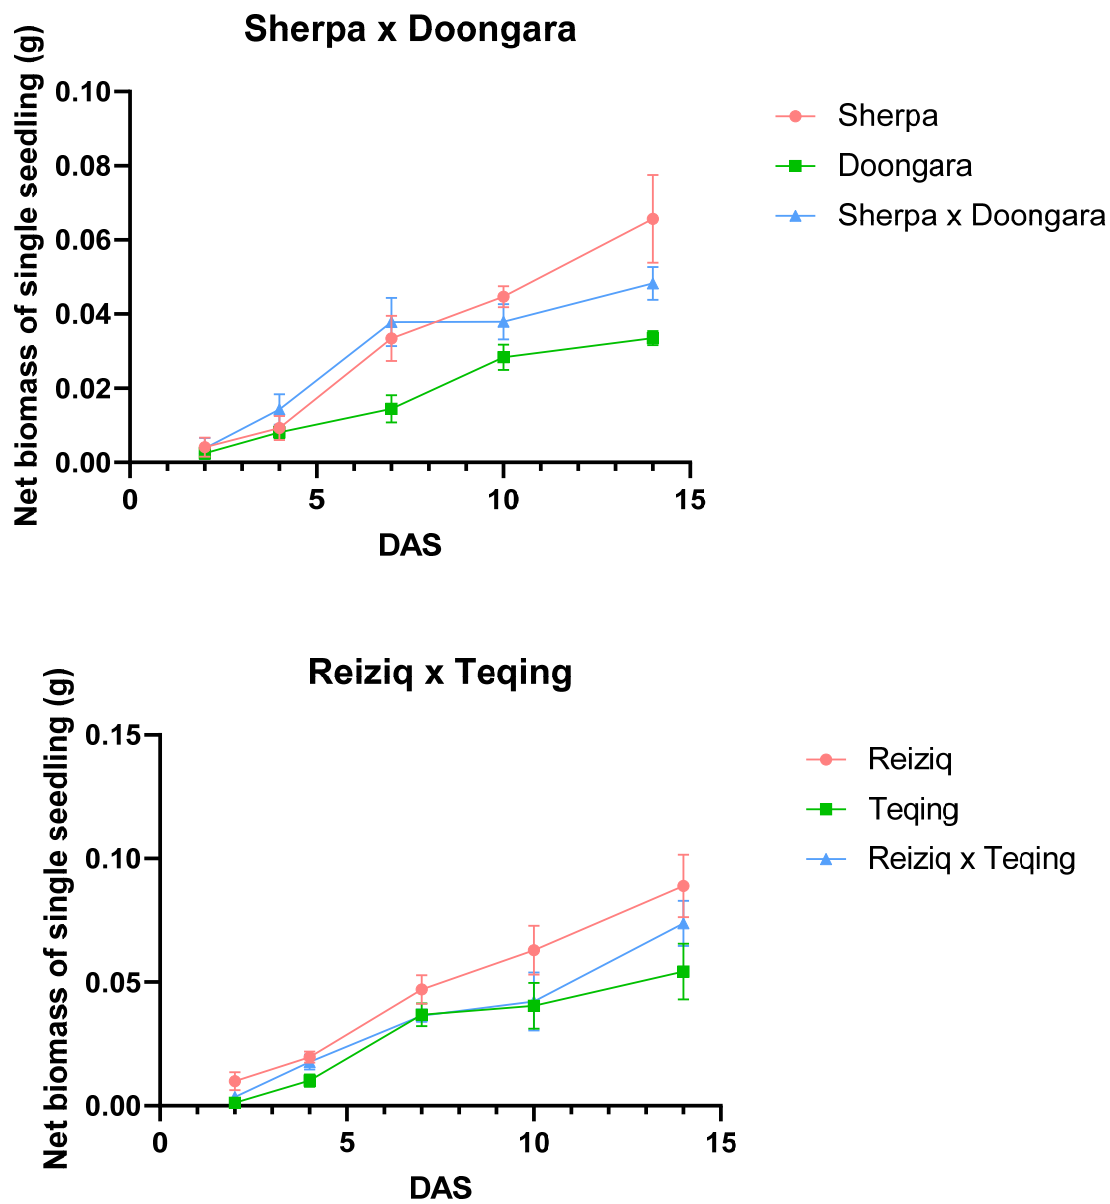

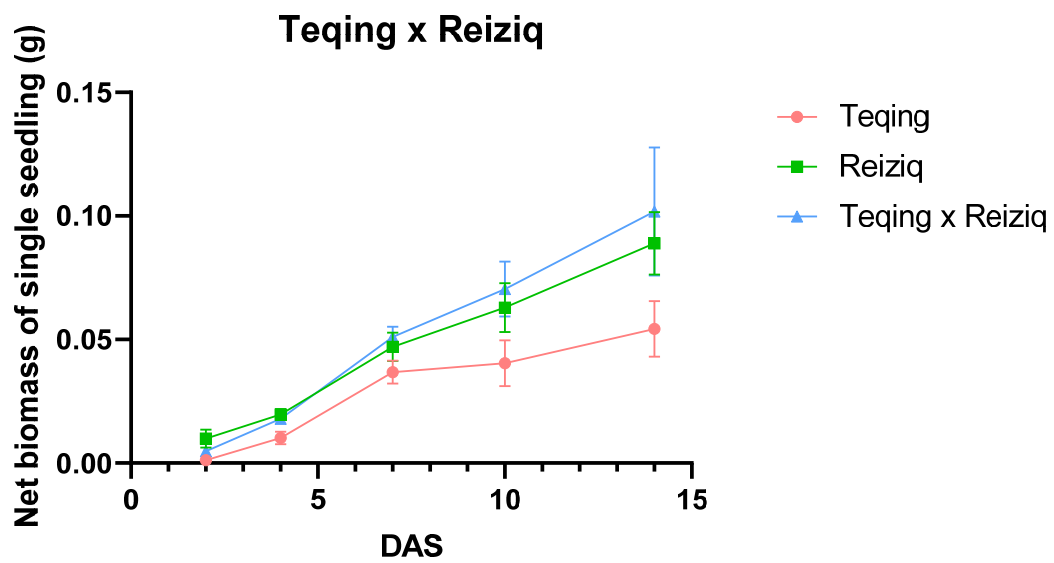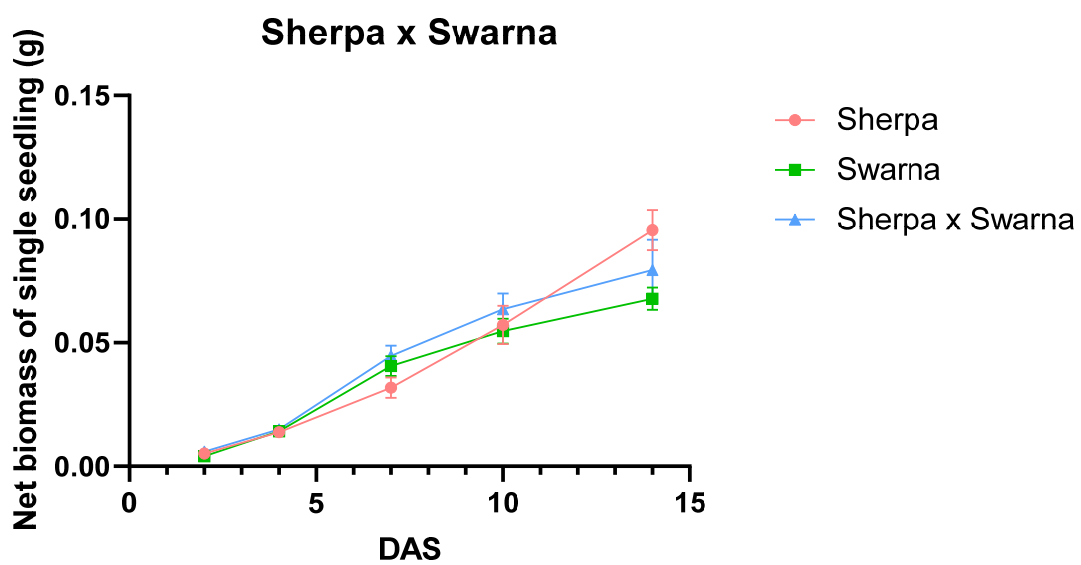

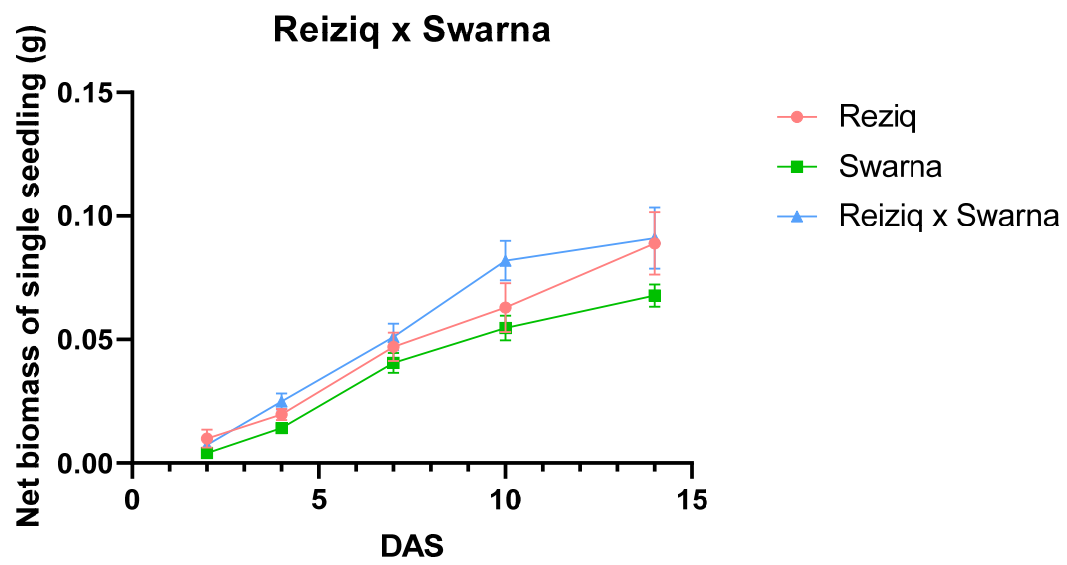

Supplement: s1 [file s1]
