# Supplementary material
Source: MDPI journal article supplement (https://www.mdpi.com/2073-4395/12/7/1559)

**Supplementary Figure S2: The etiolated seedlings after seven-day dark germination.** The first row is ‘Doongara’, the second row is ‘Reiziq’, and the third row is the F1 hybrid.

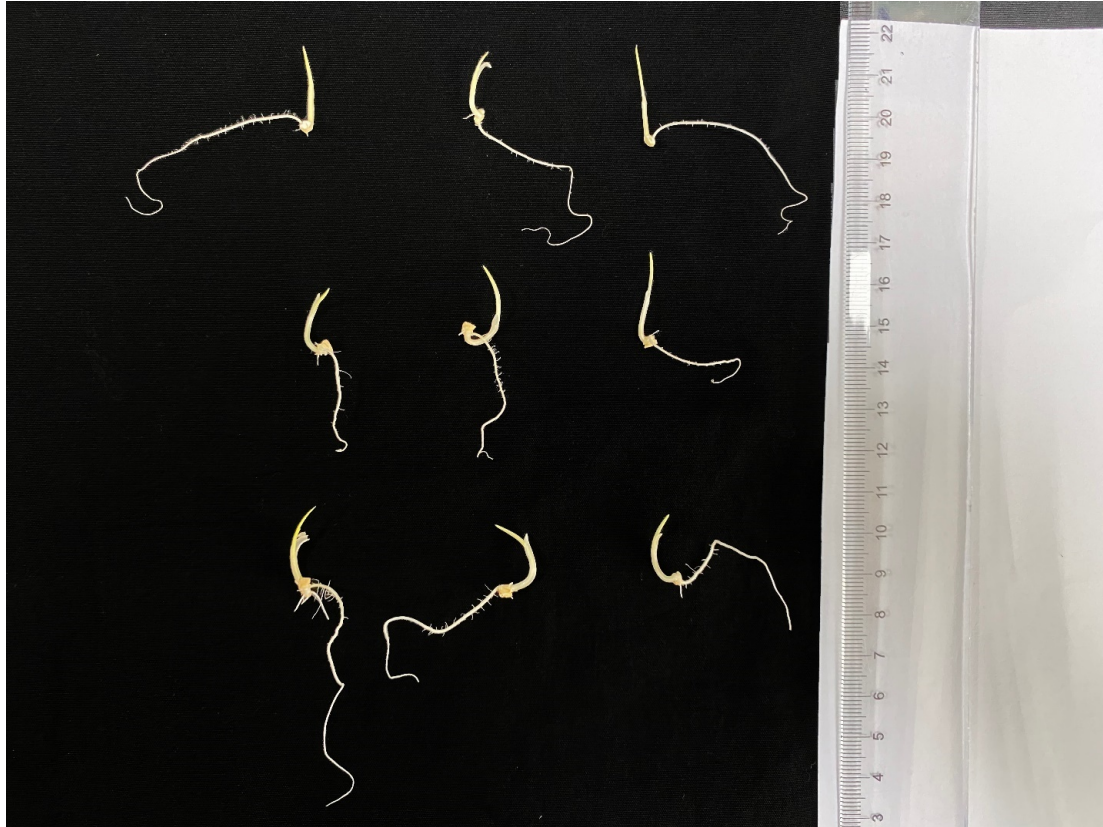

Supplement: s1 [file s1 › Supplementary Figure S2.pdf]
