# Supplementary material
Source: MDPI journal article supplement (https://www.mdpi.com/2073-4395/12/7/1559)

**Supplementary Figure S4: Plant height, panicle number and seed setting rate from parental lines to the F5 generation**

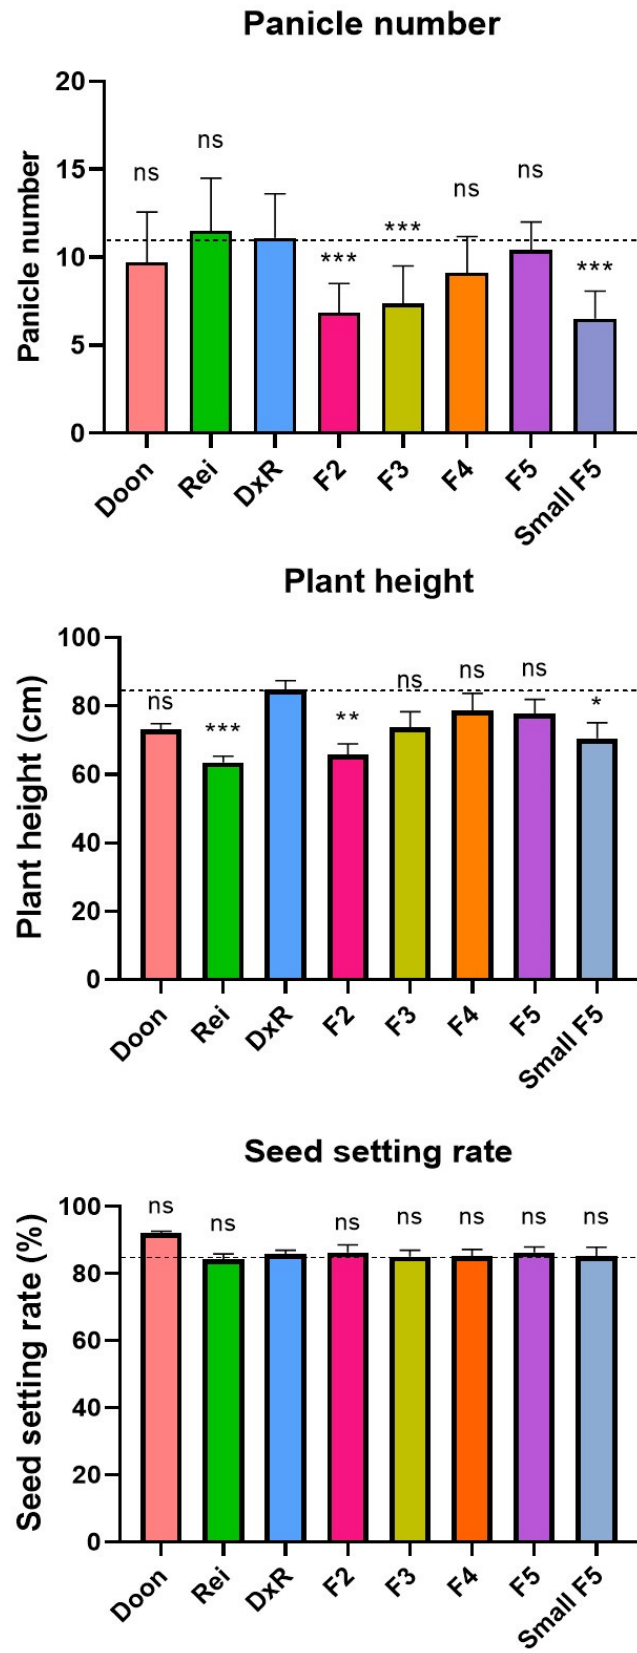

Supplement: s1 [file s1 › Supplementary Figure S4.pdf]
