# Supplementary material
Source: MDPI journal article supplement (https://www.mdpi.com/2073-4395/12/7/1559)
Supplement: s1 [file s1 › Supplementary Table S1.pdf]

**Supplementary Table S1: Partial agronomic measurement of 50 ‘Doongara’ x ‘Reiziq’ F2 samples**

| Sample ID | Total Biomass (g) | Grain Yield (g) |
|-----------|-------------------|-----------------|
| T1-R5-C9  | 14.60             | 5.02            |
| T1-R6-C8  | 15.18             | 4.21            |
| T1-R7-C4  | 15.60             | 4.7             |
| T1-R7-C6  | 15.65             | 5.07            |
| T1-R7-C7  | 16.72             | 4.51            |
| T1-R7-C8  | 10.69             | 6.21            |
| T1-R7-C9  | 6.23              | 2.77            |
| T1-R8-C7  | 21.73             | 5.39            |
| T1-R9-C3  | 17.06             | 2.52            |
| T1-R9-C4  | 16.76             | 4.16            |
| T1-R9-C6  | 15.99             | 3.3             |
| T1-R9-C9  | 15.51             | 1.86            |
| T2-R10-C7 | 16.49             | 7.84            |
| T2-R11-C9 | 29.94             | 4.78            |
| T2-R16-C9 | 9.40              | 5.57            |
| T2-R17-C2 | 21.93             | 6.9             |
| T2-R17-C4 | 11.79             | 1.99            |
| T2-R18-C6 | 17.24             | 6.69            |
| T3-R1-C3  | 17.39             | 5.08            |
| T3-R1-C5  | 17.97             | 5.73            |
| T3-R2-C7  | 35.48             | 21.26           |
| T3-R3-C3  | 22.68             | 5.87            |
| T3-R4-C6  | 14.23             | 4.09            |
| T3-R5-C2  | 17.96             | 3.3             |
| T3-R5-C3  | 22.04             | 5.26            |
| T3-R7-C1  | 19.26             | 7.86            |
| T3-R7-C9  | 33.83             | 10.37           |
| T3-R8-C1  | 27.62             | 11.98           |
| T4-R10-C1 | 26.00             | 7.47            |
| T4-R10-C2 | 21.54             | 4.84            |
| T4-R10-C3 | 21.14             | 8.41            |
| T4-R10-C5 | 29.48             | 7.98            |
| T4-R10-C7 | 26.02             | 7.16            |
| T4-R11-C4 | 20.40             | 7.34            |
| T4-R11-C6 | 20.47             | 6.64            |
| T4-R11-C7 | 28.09             | 7.76            |
| T4-R11-C8 | 24.64             | 6.51            |
| T4-R12-C7 | 50.21             | 7.9             |
| T4-R13-C7 | 26.86             | 5.28            |

|           |       |       |
|-----------|-------|-------|
| T4-R13-C9 | 21.00 | 4.08  |
| T4-R14-C3 | 20.53 | 8.37  |
| T4-R14-C4 | 29.83 | 8.64  |
| T4-R14-C9 | 18.38 | 5.4   |
| T4-R15-C5 | 21.83 | 8.09  |
| T4-R15-C6 | 25.35 | 8.85  |
| T4-R16-C5 | 28.73 | 5.4   |
| T4-R17-C9 | 26.78 | 16.95 |
| T4-R18-C5 | 40.38 | 12.1  |
| T4-R18-C6 | 21.81 | 7.75  |
| T4-R18-C9 | 23.89 | 7.53  |
