# Supplementary material
Source: MDPI journal article supplement (https://www.mdpi.com/2073-4395/12/7/1559)
Supplement: s1 [file s1 › Supplementary Table S2.pdf]

**Supplementary Table S2: Partial agronomic measurement of 50 ‘Doongara’ x ‘Reiziq’ F3 samples**

| Sample ID | Total Biomass (g) | Grain Yield (g) |
|-----------|-------------------|-----------------|
| 1,1,3     | 20.15             | 3.74            |
| 1,1,5     | 19.20             | 3.34            |
| 1,1,8     | 17.87             | 3.27            |
| 1,10,1    | 16.89             | 7.68            |
| 1,10,2    | 16.47             | 8.08            |
| 1,10,3    | 17.19             | 8.75            |
| 1,10,4    | 17.27             | 9.59            |
| 1,10,5    | 13.72             | 6.58            |
| 1,10,6    | 19.58             | 9.60            |
| 1,10,7    | 14.94             | 5.89            |
| 1,10,8    | 17.52             | 9.12            |
| 1,10,9    | 19.62             | 5.95            |
| 1,2,5     | 14.36             | 2.26            |
| 1,2,9     | 15.23             | 5.95            |
| 1,3,1     | 13.13             | 2.35            |
| 1,3,2     | 9.13              | 1.02            |
| 1,3,6     | 15.93             | 1.98            |
| 1,3,9     | 16.43             | 1.99            |
| 1,4,1     | 14.23             | 3.38            |
| 1,4,2     | 16.20             | 4.26            |
| 1,4,8     | 11.05             | 2.01            |
| 1,4,9     | 16.30             | 5.79            |
| 1,5,1     | 13.00             | 5.29            |
| 1,5,3     | 8.92              | 1.86            |
| 1,5,5     | 10.76             | 3.22            |
| 1,5,6     | 12.46             | 4.79            |
| 1,5,7     | 5.86              | 5.24            |
| 1,5,8     | 15.20             | 6.11            |
| 1,5,9     | 15.82             | 3.62            |
| 1,6,1     | 11.00             | 4.59            |
| 1,6,3     | 11.00             | 1.62            |
| 1,6,6     | 25.91             | 6.26            |
| 1,6,8     | 19.46             | 5.9             |
| 1,6,9     | 15.37             | 4.56            |
| 1,7,2     | 16.64             | 4.79            |
| 1,7,4     | 10.50             | 1.71            |
| 1,7,5     | 9.47              | 1.99            |
| 1,7,7     | 14.51             | 5.86            |
| 1,7,8     | 13.89             | 4.9             |

|       |       |      |
|-------|-------|------|
| 1,7,9 | 16.81 | 6.1  |
| 1,8,1 | 17.23 | 8.88 |
| 1,8,3 | 16.14 | 6.57 |
| 1,8,5 | 15.42 | 5.21 |
| 1,8,6 | 14.96 | 4.21 |
| 1,8,8 | 13.28 | 5.47 |
| 1,8,9 | 17.94 | 4.24 |
| 1,9,1 | 11.05 | 4.57 |
| 1,9,2 | 15.19 | 6.00 |
| 1,9,3 | 17.44 | 7.08 |
| 1,9,4 | 14.49 | 5.62 |
