# Supplementary material
Source: MDPI journal article supplement (https://www.mdpi.com/2073-4395/12/7/1559)
Supplement: s1 [file s1 › Supplementary Table S3.pdf]

**Supplementary Table S3: Partial agronomic measurement of 50 ‘Doongara’ x ‘Reiziq’ F4 samples**

| Location | Biomass | yield |
|----------|---------|-------|
| 1,1,6    | 12.44   | 5.67  |
| 1,2,5    | 11.72   | 4.98  |
| 1,3,5    | 14.78   | 6.85  |
| 1,3,6    | 10.91   | 4.62  |
| 1,3,7    | 10.79   | 4.27  |
| 1,5,3    | 11.26   | 2.58  |
| 2,1,1    | 8.3     | 2.98  |
| 3,1,2    | 11.98   | 5.33  |
| 3,1,3    | 12.72   | 3.43  |
| 3,1,4    | 14.13   | 6.25  |
| 3,2,4    | 14.39   | 6.52  |
| 3,3,3    | 9.97    | 4.87  |
| 3,4,5    | 12.58   | 6.18  |
| 3,5,1    | 12.06   | 4.62  |
| 3,5,3    | 10.93   | 5.18  |
| 3,5,5    | 13.86   | 7.08  |
| 4,1,4    | 15.52   | 7.58  |
| 4,1,5    | 16.11   | 4.56  |
| 4,4,1    | 14.93   | 5.85  |
| 4,4,6    | 13.34   | 5.73  |
| 4,5,6    | 15.66   | 4.59  |
| 4,6,3    | 15.88   | 6.28  |
| 4,6,4    | 14.29   | 6.22  |
| 1,1,4    | 10.79   | 5.96  |
| 1,1,2    | 13.67   | 2.89  |
| 1,2,1    | 11.84   | 2.59  |
| 1,3,1    | 11.62   | 3.24  |
| 1,3,2    | 12.29   | 3.94  |
| 1,5,4    | 15.54   | 5.61  |
| 2,1,5    | 10.7    | 4.26  |
| 2,3,7    | 8.49    | 1.97  |
| 3,4,1    | 11.29   | 4.55  |
| 3,4,2    | 12.66   | 5.11  |
| 3,4,4    | 15.8    | 6.49  |
| 3,5,4    | 11.26   | 4.38  |
| 3,6,1    | 11.32   | 3.7   |
| 3,6,2    | 13.34   | 3.31  |
| 3,6,3    | 14.79   | 1.18  |
| 3,6,5    | 11.81   | 3.75  |

|       |       |      |
|-------|-------|------|
| 3,6,7 | 14.44 | 3.63 |
| 4,1,1 | 10.61 | 1.41 |
| 4,1,7 | 11.63 | 4.25 |
| 4,4,4 | 11.31 | 3.12 |
| 4,4,5 | 10.3  | 2.14 |
| 1,3,4 | 12.68 | 4.3  |
| 1,4,1 | 12.41 | 4.43 |
| 1,4,5 | 16.98 | 3.33 |
| 1,5,2 | 16.33 | 6.06 |
| 2,2,2 | 12.18 | 3.03 |
| 2,2,3 | 14.18 | 3.12 |
