# Supplementary material
Source: MDPI journal article supplement (https://www.mdpi.com/2073-4395/12/7/1559)
Supplement: s1 [file s1 › Supplementary Table S4.pdf]

**Supplementary Table S4: The primers of target genes and the housekeeper gene for RT-qPCR**

| Gene ID      | Gene Name | Gene full name                                  |   | Primers                 |
|--------------|-----------|-------------------------------------------------|---|-------------------------|
| Os03g0718100 | Actin     |                                                 | F | CTAAGCCAAGAGGAGCTGTTAT  |
|              |           |                                                 | R | ATAACAGATAGGCCGTTGAAA   |
| Os01g0600900 | Cab2      | Chlorophyll a-b binding protein 2               | F | ACCCCGTCAACAACAACGCC    |
|              |           |                                                 | R | CGTACACACACGCACACTCTCC  |
| Os02g0197600 | Cab8      | Chlorophyll a-b binding protein 8               | F | GGAGCACACATTTTCAGCTCACC |
|              |           |                                                 | R | AAGATTGCAATGGCCTCCCC    |
| Os08g0435900 | CabP4     | Chlorophyll a-b binding protein P4              | F | AACCCCTCAACTTCGAGCC     |
|              |           |                                                 | R | CTGCAGCAGGTTGTCTGAAGG   |
| Os06g0320500 | Cab21     | Chlorophyll a-b binding protein 1B-21           | F | GCAAGGAGAAGGAGAAGGTAGG  |
|              |           |                                                 | R | ATGGACCTAGGAGAGGAGTAGG  |
| Os11g0242800 | Cab26     | Chlorophyll a-b binding protein CP26            | F | TCATCCAGGCCTACGTCACC    |
|              |           |                                                 | R | GGCGGCGAGATGTTTACAGG    |
| Os01g0720500 | LHCII     | Chlorophyll a-b binding protein of LHCII type 1 | F | CGCCATGTTCTCCATGTTTCGG  |
|              |           |                                                 | R | GGAGATCCACACTCACTTGCC   |
| Os07g0148900 | psaK      | Photosystem I reaction center subunit psaK      | F | GCAAGGAGAAGGAGAAGGTAGG  |
|              |           |                                                 | R | ATGGACCTAGGAGAGGAGTAGG  |
| Os03g0778100 | PSI-F     | photosystem I reaction center subunit III       | F | TGAGCTCATCACCGGCAACC    |
|              |           |                                                 | R | TCCACTGCCAAATCAACTCACC  |
| Os03g0343900 | PsbX      | Photosystem II reaction centre X protein        | F | ACGTACGTGTTTGTGTTGGC    |
|              |           |                                                 | R | ACAAAGAAGATAGGGGCGCT    |
| Os01g0938100 | Psb28     | photosystem II reaction center PSB28 protein    | F | CTCCAAGAGCCACCAAACGG    |
|              |           |                                                 | R | CGCCGAACGATGAATGCAGG    |
